# Supplementary material for: ΔNp73 overexpression promotes resistance to apoptosis but does not cooperate with PML/RARA in the induction of an APL-leukemic phenotype
Source: PubMed Central journal article supplement (PMC5352415; doi:10.18632/oncotarget.14295), 2016-12-27
Supplement: oncotarget-08-8475-s001.pdf [file oncotarget-08-8475-s001.pdf]

# **$\Delta$ Np73 overexpression promotes resistance to apoptosis but does not cooperate with PML/RARA in the induction of an APL-leukemic phenotype**

## **SUPPLEMENTARY DATA**

### **MATERIALS AND METHODS**

#### **Cell line culture**

The human APL derived cell line NB4 carrying the t(15;17) translocation and expressing the PML/RARA fusion protein was purchased from the American Tissue Culture Collection (ATCC, Rockville, MD) and was cultured at 37°C in a humidified atmosphere of 5% CO<sub>2</sub> in air, in RPMI medium (GIBCOBRL, Grand Island, NY, USA), supplemented with 10% fetal bovine serum (FBS) (GIBCO-BRL, Grand Island, NY, USA), 20 mM Hepes. Cell viability was determined via trypan blue assay, and only cultures with 95% viability were used for subsequent *in vitro* experiments.

## **RESULTS**

#### **Generation of $\Delta$ Np73-PML/RARA double mutant murine cells**

The human coding sequence of the  $\Delta$ Np73 gene was stably overexpressed in murine hematopoietic BM cells from hCG-PML/RARA transgenic mice and its wild-type counterpart using a lentiviral vector in which  $\Delta$ Np73 expression was driven by the MSCV promoter (Supplementary Figure 1A). To determine the efficiency of infection, GFP-positive cells were quantified by flow

cytometry. Infected cells were highly purified based on the expression of GFP protein. Similar infection rates were reached in both hCG-PML/RARA and WT cells (Supplementary Figure 1B). Additionally, cytospin preparations stained with DAPI were used for fluorescence evaluation (Supplementary Figure 1C). In order to confirm if the infection of  $\Delta$ Np73 gene had efficiently resulted in a translation of its protein, transfected murine BM cells were lysed and protein lysates prepared using previously described methods. As shown in Supplementary Figure 1D, cells infected with pMEG- $\Delta$ Np73 lentivirus efficiently expressed the  $\Delta$ Np73 protein. Next, we took advantage of the PML/RARA-positive NB4 cell line to demonstrate the ratio between truncated ( $\Delta$ Np73) and transcriptionally active (TAp73) isoforms in our lentiviral model (Supplementary Figure 2).

#### ***In vivo* assays**

Supplementary Table 1 shows the hematological parameters of recipient mice transplanted with PML/RARA-positive cells or WT cells, with or without human  $\Delta$ Np73. After 120 days of follow-up, all recipients were censored and morphological evaluation of BM or spleen cells was performed. No evidence of malignant transformation or myelodysplasia was observed.

SUPPLEMENTARY FIGURES AND TABLE

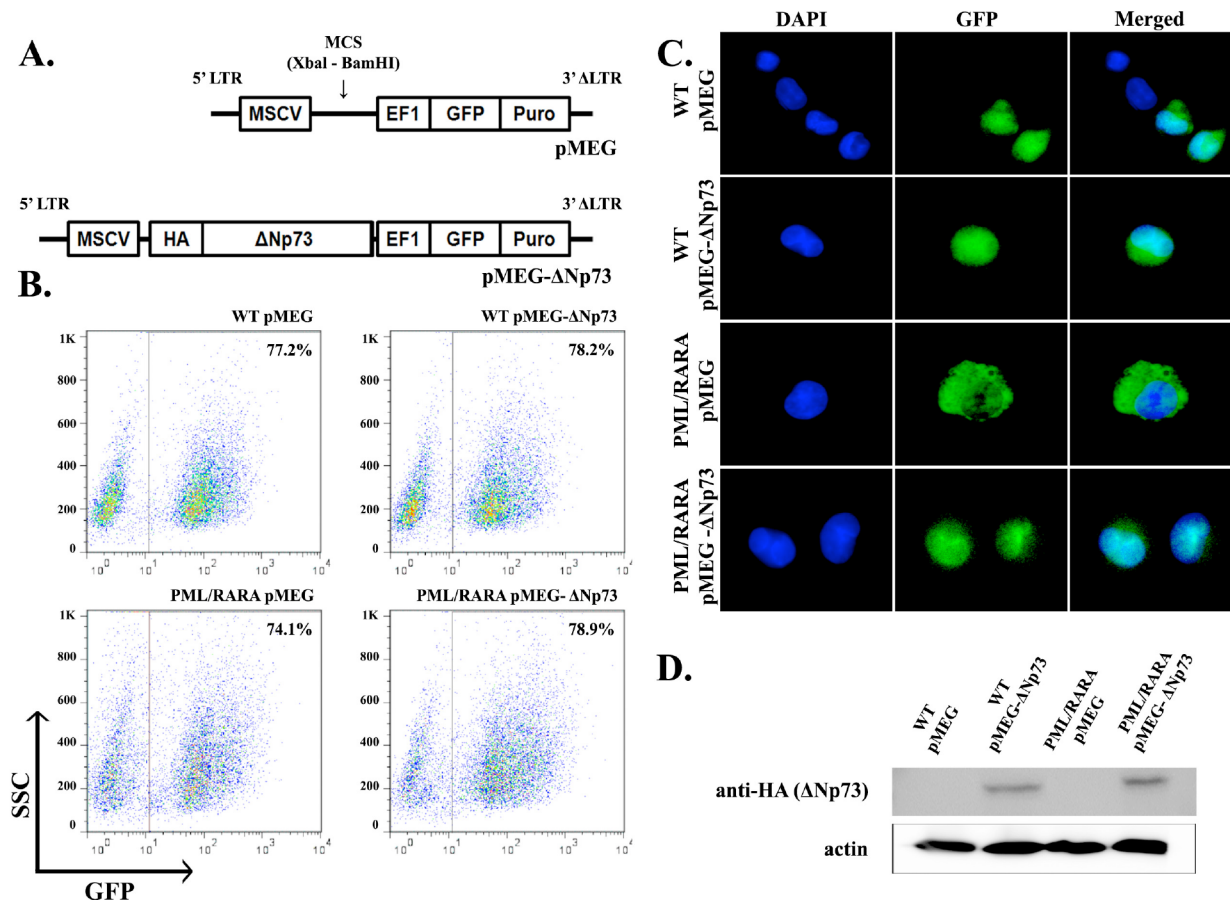

**Supplementary Figure 1:** **A.** Generation of  $\Delta$ Np73-PML/RARA double mutant murine cells. Lentiviral vector encoding  $\Delta$ Np73 cDNA. **B.** Representative FACS plot analysis of hCG-PML/RARA and WT murine BM cells overexpressing (GFP-positive) the  $\Delta$ Np73 or not. **C.** Immunofluorescence analysis of cytospin preparations of BM cells stained with DAPI. **D.** Western blot of total protein lysates from PML/RARA-positive and WT cells infected with empty vector (pMEG) or pMEG- $\Delta$ Np73 lentiviruses. A total of 30  $\mu$ g of protein was loaded in each lane.

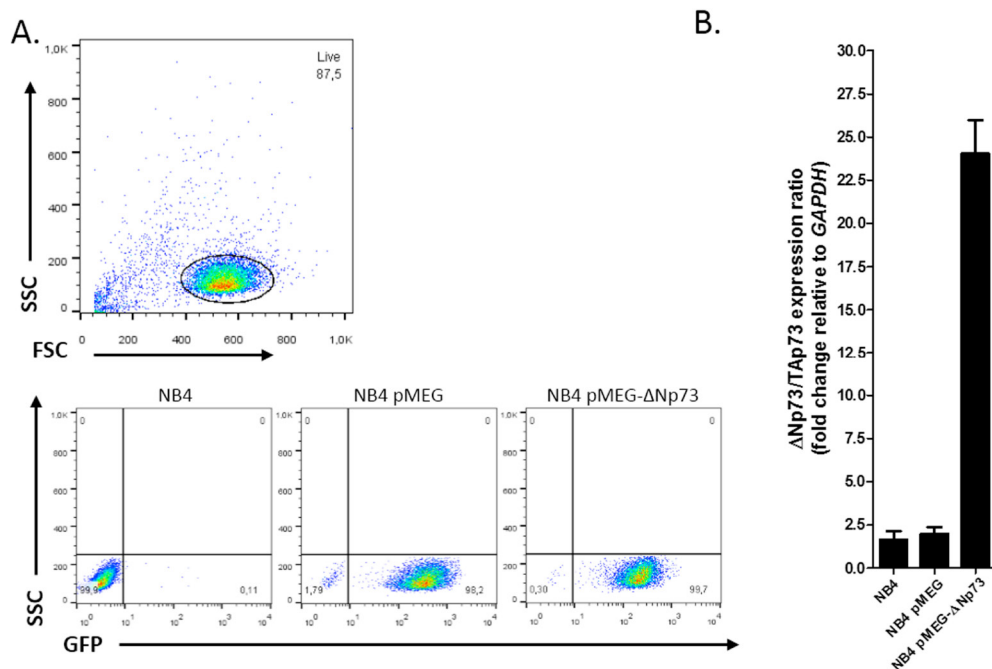

**Supplementary Figure 2:  $\Delta$ Np73/TAp73 expression ratio in NB4 cell line.** **A.** Representative example of GFP-positive cells. After infection with pMEG or pMEG- $\Delta$ Np73 lentiviri, NB4 cell line was positive selected using sorting procedure. Percentage of GFP-positive cells are represented in plots. **B.** Real time quantitative polymerase chain reaction showing the upregulation of the  $\Delta$ Np73. NB4 cell line infected with  $\Delta$ Np73 lentivirus showed a 50-fold higher expression of  $\Delta$ Np73/TAp73 ratio.

**Supplementary Table 1: Hematological parameters of transplanted hCG-PML/RARA and WT mice**

| Groups                               | Hematological parameters       |                   |                               |
|--------------------------------------|--------------------------------|-------------------|-------------------------------|
|                                      | Leucocytes ( $\times 10^9/L$ ) | Hemoglobin (g/dl) | Platelets ( $\times 10^9/L$ ) |
| WT pMEG, n = 10                      | 18 (11 to 23)                  | 12 (10 to 14)     | 1430 (1180 to 1880)           |
| WT pMEG- $\Delta$ Np73, n = 10       | 11 (9 to 19)                   | 12.5 (9 to 14)    | 1155 (910 to 1250)            |
| PML/RARA pMEG, n = 10                | 32 (9 to 201)                  | 9 (7 to 10)       | 910 (610 to 1390)             |
| PML/RARA pMEG- $\Delta$ Np73, n = 10 | 16 (7 to 19)                   | 10 (9 to 13)      | 970 (850 to 1230)             |
| <i>P</i> -value                      | 0.34                           | 0.03*             | 0.044*                        |

The data were presented as median (range).

\* *P*-value < 0.05 (one-way ANOVA followed by Bonferroni's multiple comparison test).
